# 1 The knockout of the HMG domain of the porcine SRY gene causes 2 sex reversal in gene-edited pigs

3  
4 **Stefanie Kurtz**<sup>1</sup>, Andrea Lucas-Hahn<sup>1</sup>, Brigitte Schlegelberger<sup>2</sup>, Gudrun Göhring<sup>2</sup>, Heiner  
5 Niemann<sup>3</sup>, Thomas C. Mettenleiter<sup>4</sup>, Björn Petersen<sup>1\*</sup>  
6

7 <sup>1</sup>Institute of Farm Animal Genetics, Friedrich-Loeffler-Institut, Mariensee, 31535 Neustadt am  
8 Rügenberge, Germany

9 <sup>2</sup>Institute of Human Genetics, Hannover Medical School, 30625 Hannover, Germany

10 <sup>3</sup>Clinic for Gastroenterology, Hepatology and Endocrinology, Hannover Medical School, 30625  
11 Hannover, Germany

12 <sup>4</sup>Friedrich-Loeffler-Institut, 17493 Greifswald, Insel Riems, Germany  
13

14 \*Corresponding author: [bjorn.petersen@fli.de](mailto:bjorn.petersen@fli.de); +49 5034 8715196; Institute of Farm Animal Genetics, Friedrich-  
15 Loeffler-Institut, Höltystraße 10, 31535 Neustadt am Rügenberge, Germany  
16  
17

## 18 **Classification**

19  
20 Biological sciences - Genetics  
21

## 22 **Keywords**

23 Porcine SRY gene; sex reversal; CRISPR/Cas9; RNPs; HMG domain  
24

## 25 **Author Contributions**

26 Stefanie Kurtz: designed and performed the experiments, analyzed and discussed the data,  
27 wrote the manuscript

28 Andrea Lucas-Hahn: performed SCNT and microinjection technique

29 Brigitte Schlegelberger: performed karyotyping, supervised the project and discussed the  
30 results

31 Gudrun Göhring: performed karyotyping

32 Heiner Niemann: supervised the project, discussed the results and contributed to  
33 manuscript writing

34 Thomas C. Mettenleiter: initiated the project, discussed the results and contributed to  
35 manuscript writing

36 Björn Petersen: supervised the project, contributed to the design and implementation of the  
37 research, discussed the results and contributed to manuscript writing  
38

## 39 **This PDF file includes:**

40 Main Text  
41 Figures 1 to 9  
42 Tables 1

## 43 **1 Abstract**

44 The sex-determining region on the Y chromosome (SRY) is thought to be the central genetic  
45 element of male sex development. Mutations within the SRY gene are associated with a  
46 male-to-female sex reversal syndrome in humans and other mammalian species such as  
47 mice and rabbits. However, the underlying mechanisms are largely unknown. To understand  
48 the biological function of the SRY gene, a site-directed mutational analysis is required to  
49 investigate associated phenotypic changes at the molecular, cellular and morphological  
50 level. In our study, we successfully generated a knockout of the porcine SRY gene by  
51 microinjection of two clustered regularly interspaced short palindromic repeats (CRISPR) –  
52 associated protein - 9 nuclease (Cas9) ribonucleoprotein (RNP) complexes targeting the  
53 centrally located “high mobility group” (HMG) domain of the SRY gene. Mutations within this  
54 region resulted in the development of complete external and internal female genitalia in  
55 genetically male pigs. The internal female genitalia including uteri, ovaries, and oviducts,  
56 revealed substantial size differences in 9-months old SRY-knockout pigs compared to age-  
57 matched female wild type controls. In contrast, a deletion within the 5’ flanking region of the  
58 HMG domain was not associated with sex reversal. Results of this study demonstrates for  
59 the first time the central role of the HMG domain of the SRY gene in male sex determination  
60 in pigs. Moreover, quantitative analysis by digital PCR revealed evidence for a duplication of  
61 the porcine SRY locus. Our results pave the way towards the generation of boars exclusively  
62 producing phenotypically female offspring to avoid surgical castration without anesthesia in  
63 piglets. Moreover, the study establishes a large animal model that is much more similar to  
64 humans in regard of physiology and anatomy and pivotal for longitudinal studies.

65

## 66 **2 Introduction**

67 In mammals, the male and female sex are determined by the presence or absence of the Y  
68 chromosome (1). The sex-determining region on the Y chromosome (SRY) is located on the  
69 short arm of the Y chromosome and is presumed to be critical for sex determination during  
70 embryogenesis (2, 3). In pigs, the SRY gene consists of a single exon, with an open reading  
71 frame of 624 bp representing 206 amino acids and encodes for the testis-determining  
72 transcription factor (TDF). It is expressed in the male genital ridge at the time of sex  
73 determination (4). The porcine SRY gene is first expressed on day 21 post coitum (p.c.) with  
74 highest expression levels between day 21 and 23 p.c. Shortly after onset of SRY expression,  
75 testis formation can be histologically determined between day 24 to 27 p.c. (5, 6).  
76 Accordingly, the SRY gene is assumed to serve as the master regulator causing the formation  
77 of primary precursor cells of tubuli seminiferi leading to the development of testicles from  
78 undifferentiated gonads (7). However, it is still unknown whether the SRY gene is the only  
79 sex-determining gene on the Y chromosome or if other genes such as SOX9 (8-10) and SOX3  
80 (11) are involved as well.

81 In previous studies in mice (12) and rabbits (13), the SRY gene was knocked out using  
82 different target regions. Both, the knockout of 92 % of the murine SRY gene by TALENs, or  
83 the CRISPR/Cas-mediated knockout of the Sp1-DNA-binding sites of the rabbit SRY gene  
84 caused sex reversal. Nevertheless, sequence divergence of the SRY gene between  
85 mammalian species limited its direct structural and functional comparison and the  
86 investigation of mammalian sex determination. So far, analysis of the SRY gene has almost  
87 exclusively been done in small animals, mostly mice, and knowledge about the SRY gene in  
88 large animal species, especially the porcine SRY gene is scarce.

89 The goal of the present study was to characterize the porcine SRY gene and its HMG domain  
90 in male sex determination by knocking out different target sites of the porcine SRY gene via

91 intracytoplasmic microinjection of two CRISPR/Cas9 RNPs or cell transfection followed by  
92 somatic cell nuclear transfer (SCNT) (Fig. 1). The generation of SRY-knockout pigs give  
93 insights into the biological function of the SRY gene in a large animal species. While, the  
94 murine SRY gene shows only 75% similarity to the human SRY gene, the porcine and human  
95 SRY genes are closely related (~85 % amino acid homology) and show similar expression  
96 profiles (5, 14). Therefore, a knockout of the highly conserved HMG domain in the porcine  
97 model may pave the way for a suitable large animal model for the human male-to-female  
98 sex reversal syndrome.

## 100 4 Results

102 **Production of SRY-knockout pigs.** To generate SRY-knockout (SRY-KO) pigs, a deletion of  
103 approx. 300bp, encompassing the HMG domain in the porcine SRY gene was introduced (Fig.  
104 2a). Thirty-one and thirty-two embryos derived from intracytoplasmic microinjection of  
105 gRNA SRY\_1 and SRY\_3 into IVF-produced zygotes were surgically transferred into three  
106 synchronized sows. Two recipients went to term and delivered twelve healthy piglets with  
107 female phenotypes (Tab. 1/ Fig. 3). Three of the piglets showed a deletion of approx. 300 bp  
108 within the HMG domain of the SRY gene (Fig 4). Sequencing of the target region revealed  
109 frameshift mutations of – 266 bp in piglet 715/2, and – 292 bp in piglet 715/7. Two different  
110 genetic modifications, including a deletion of 298 bp and an indel formation with a deletion  
111 of 298 bp and an insertion of 1 bp were detected in piglet 714/1 (Fig. 5).<sup>34</sup> Furthermore,  
112 analysis of six Y chromosome specific genes (KDM6A, TXLINGY, DDX3Y, CUL4BY, UBA1Y and  
113 UTY) demonstrated a male genotype and successful sex reversal in these piglets (Fig. S1, Tab.  
114 S1). To ultimately confirm the male genotype of these piglets (715/2, 715/7 and 714/1), cells  
115 from ear tissue were karyotyped detecting the Y chromosome in all three piglets (Fig. 6, Fig.  
116 S2). No chromosomal abnormalities were observed in the sex-reversed pigs 715/2 and  
117 715/7, while piglet 714/1 revealed an inversion of chromosome 7 (Fig. S2). The origin of this  
118 clonal cytogenetic aberration remains unclear. It may not necessarily be related to the  
119 CRISPR/Cas system because no off-target event was found on chromosome 7. In total, 34  
120 potential off-target sites within the porcine genome were identified  
121 (<http://crispor.tefor.net/>). We designed primers for the top ten off-target sites for each  
122 gRNA (Tab. S2/S3). In one off-target site for gRNA\_SRY1 and three off-target sites for  
123 gRNA\_SRY3 PCR amplification following Sanger sequencing was not possible. Overall, no off-  
124 target events were observed (Fig. S3-S5). All SRY-KO pigs developed normally without any  
125 health impairment (Fig. S6, Tab. S4).

126 In a second approach, one piglet generated via intracytoplasmic microinjection of gRNAs  
127 SRY\_1 and SRY\_2 targeting the 5' flanking region of the HMG domain (Fig. 2b) was born with  
128 an in-frame mutation of – 72 bp on the SRY locus, which did not lead to sex reversal (Fig. S7).

130 **External and internal genitalia of the SRY-KO pigs.** We investigated the external and internal  
131 genitalia of the SRY-KO pigs. Age-matched wild type (WT) females from conventional  
132 artificial insemination and female littermates of the SRY-KO pigs produced by microinjection  
133 served as controls. At the age of 34 days, the external genitalia of the SRY-KO piglets were  
134 similar to the external genitalia of female littermates and WT controls. To further investigate  
135 the internal genitalia, the ovaries, oviducts and uteri of the 34 days old SRY-KO piglets and  
136 female controls were prepared. The SRY-KO piglets had complete female internal genitalia,  
137 including ovaries, oviducts and uteri that were similar to that of age matched WT females

138 (Fig. S8). Moreover, histological analysis of the inner structure of the ovaries revealed no  
139 alteration in these young piglets (Fig. S9).

140 However, substantial size differences of the female genitalia were obvious in 9-months old  
141 SRY-KO pigs compared to age-matched wild type controls (Fig. 7), with gene-edited animals  
142 showing a substantially smaller genital tract. The SRY-KO pigs were not observed in heat,  
143 even after three consecutive treatments of 1,000 IU PMSG (Pregmagon®, IDT Biologika)  
144 followed 72 hours later by an intramuscular injection of 500 to 1,000 IU hCG (Ovogest®300,  
145 MSD Germany) to induce estrus. Histological analysis of the ovaries of 9-months old SRY-KO  
146 pigs revealed a high amount of loose connective tissue (Fig. S10). These results provided  
147 evidence that the SRY-KO caused sex reversal in genetically male pigs with the development  
148 of female external and internal genitalia, which lends further support to the central role of  
149 the SRY gene in male sex determination during porcine embryogenesis. Re-cloning of piglet  
150 715/2 led to seven sex-reversed piglets and demonstrated unequivocally that the elaborated  
151 strategy described in this study can be used to successfully produce sex-reversed pigs (Fig.  
152 S11 to S14).

153

154 **Duplication of the porcine SRY gene.** Investigation of the HMG domain of the porcine SRY  
155 gene revealed one pig derived from intracytoplasmic microinjection (714/1) that displayed  
156 two different genetic modifications within the SRY locus (Fig. 5). Whether these  
157 modifications originated from mosaicism caused by the microinjection or a duplication of the  
158 SRY locus was further analyzed. Analysis of different organ samples (liver, heart, colon,  
159 kidney, spleen and lung) of piglet 714/1 revealed the same two genetic modifications in all  
160 samples, arguing against mosaicism but for consideration of a duplicated SRY locus. Whole  
161 genome sequencing using the USB-connected, portable Nanopore sequencer MinION  
162 (Oxford Nanopore Technologies) and digitalPCR (QuantStudio®3D, ThermoFisher Scientific)  
163 was performed to check for a possible SRY gene duplication. Due to the high number of  
164 repetitive genes on the Y chromosome, Nanopore technology was used to sequence large  
165 DNA fragments. However, only one contig similar to the SRY sequence could be found with  
166 the assembled reads of the Nanopore Sequencing data. Even in a broad range, the sequence  
167 in the flanking regions of the SRY locus was nearly identical hampering the analysis of the  
168 duplicated SRY gene when using only the assembled Nanopore Sequencing data.

169 To further verify the duplication of the SRY gene, genomic DNA was analyzed by digital PCR.  
170 Three targets, including the monoallelic SRY and KDM6A genes on the Y chromosome, and  
171 the biallelic GGTA (galactosyltransferase) gene on chromosome 1 were selected for direct  
172 comparison of their copy numbers. The copy numbers of GGTA1 were set to two (biallelic),  
173 whereas the KDM6A and SRY genes were quantified in relation to the GGTA1 gene. In a first  
174 trial, comparison of the copy numbers of the KDM6A and GGTA1 genes revealed a 2-fold  
175 lower copy number of the monoallelic KDM6A compared to the biallelic GGTA1 in a male  
176 wild type control (WT 7214 F2), as expected. In contrast, the normally monoallelic SRY gene  
177 exhibited a similar calculated copy number as the biallelic GGTA1 gene (Fig. 8), indicating a  
178 duplication of the SRY gene.

179 A second approach confirmed these findings by comparison of the copy numbers of the SRY  
180 and GGTA1 gene in pigs with a complete SRY-KO (714/1, 715/2, 715/7), an incomplete SRY-  
181 KO (713/1) and wild type controls (Fig. 9). As expected, no signal for SRY was detected in pigs  
182 with a complete SRY-KO. For the incomplete SRY-KO, a piglet derived from intracytoplasmic  
183 microinjection of plasmids SRY\_1 and SRY\_3 was used that showed two genetic  
184 modifications, i.e. a 3 bp and a 298 bp deletion, within the SRY locus (Fig. S15/S16). Analysis  
185 of several organ samples (liver, heart, colon, spleen, kidney, epididymis, testis and lung)

186 revealed the same genetic modification in all organs, indicating that mosaicism was highly  
187 unlikely (Fig. S17). In this piglet, dPCR showed a 50 % reduced copy number of the SRY gene  
188 compared to the GGTA1 gene. The SRY probe bound to the SRY locus with the smaller  
189 deletion of 3 bp that did not interfere with the SRY assay and thereby indicated a duplication  
190 of the SRY locus. As mentioned above, a similar copy number of the monoallelic SRY gene  
191 compared to the biallelic GGTA1 gene was detected in wild type controls (Fig. 9).  
192 To further exclude that these findings originated from mosaicism, two healthy piglets were  
193 produced via SCNT using porcine fibroblasts edited with gRNAs SRY\_1 and SRY\_2 targeting  
194 the 5' flanking region of the HMG domain of the SRY gene (Fig. 2b, Fig. S18) as donor cells.  
195 Sequencing of the target site revealed two deletions of 72 bp and 73 bp in both piglets  
196 (704/1 and 2) (Tab. S5, Fig. S19/S20). These results finally proved the presumptive  
197 duplication of the porcine SRY locus.

198

## 199 **5 Discussion**

200

201 The sex-determining region on the Y chromosome (SRY) is critically involved in mammalian  
202 male sex development (5). However, the molecular function and the role that the SRY gene  
203 plays as the main switch for male sex development in all mammals are yet to be explored.  
204 Previous studies in mice (12) and rabbits (13) investigated the potential role of the SRY gene  
205 for sex development. The murine SRY gene was knocked out by introducing two base pairs  
206 into the 5' part of the ORF (open reading frame) of the SRY gene causing a frameshift. In one  
207 genetically male offspring this mutation led to a female phenotype (12). In rabbits, a  
208 disruption of the Sp1-binding site in the 5' flanking region of the SRY gene also resulted in  
209 sex reversal (13). In contrast, an in-frame mutation upstream of the HMG domain of the  
210 porcine SRY gene described in this study did not result in the generation of genetically male  
211 offspring with a female phenotype. Detection of two genetic modifications in several pigs  
212 provided evidence of a presumed duplication of the porcine SRY locus. Skinner et al.  
213 described the porcine SRY gene in a two palindromic head-to-head copy manner (15), as in  
214 rabbits (16). Quantitative analysis by digital PCR (QuantStudio®3D, ThermoFisher Scientific)  
215 revealed duplication of the SRY locus by detection of a similar copy number of the  
216 monoallelic SRY and the biallelic GGTA1 genes. Moreover, a reduction of the copy number of  
217 the SRY gene from wild type control to a complete SRY-KO pig displayed the presumed  
218 duplication in pigs generated via intracytoplasmic microinjection. Ultimately, the generation  
219 of pigs via SCNT that carried two different deletions within the SRY gene confirmed the  
220 presence of the SRY duplication, because cloning technique avoids any mosaicism. Nanopore  
221 sequencing indicated a high similarity of the two SRY loci impairing the differentiation of  
222 both loci. The alignment of the assembled reads to the reference sequence resulted in loss  
223 of information that might be crucial for differentiation of both SRY loci. An evaluation of the  
224 raw data, a de-novo assembly or an enhancement of the Nanopore Sequencing data with  
225 Illumina MiSeq data could overcome these limitations (17-19). It is still unknown, whether  
226 both copies of the porcine SRY gene are active and required for male sex development and if  
227 there is the need to reach a certain threshold expression level from the SRY locus to induce  
228 the development of a male gender as previously described in mice (20-22). To address these  
229 questions, the identification of potential single nucleotide polymorphisms (SNPs) to  
230 differentiate between the two SRY loci is desirable.

231 We report here for the first time the successful knockout of the HMG domain of the porcine  
232 SRY gene by intracytoplasmic microinjection of two CRISPR/Cas9 RNP complexes resulting in  
233 genetically male pigs with a female phenotype. The CRISPR/Cas9 system has emerged as the

234 genome editing technology of choice for many applications due to its ease of use, cost-  
235 effectivity and high specificity to introduce mutations at the targeted loci (23, 24).  
236 Nevertheless, off-target cleavages at undesired genomic sites may occur. It is necessary to  
237 further increase the specificity of the CRISPR/Cas system regarding the gRNA design (25), by  
238 involving CRISPR nickase proteins (26), using anti-CRISPR proteins (27), employing  
239 ribonucleoproteins (RNPs) (28, 29) or designing “self-restricted” CRISPR/Cas systems (30).  
240 CRISPR/Cas9 RNP components persist only temporarily in cells thereby limiting guideRNA  
241 and Cas9 expression to a short time window. The use of CRISPR/Cas9 RNPs enables efficient  
242 genome editing while significantly reducing possible off-target events and mosaicism  
243 formation. Random integration of DNA segments into the host genome as with DNA  
244 plasmids is avoided by using RNPs (28, 29, 31). However, no off-target events were found at  
245 possible sites using PCR-based analysis and Sanger sequencing in the SRY-KO pigs generated  
246 via intracytoplasmic microinjection of CRISPR/Cas RNPs. However, only with whole-genome  
247 sequencing using accurate and sensitive off-target profiling techniques such as GUIDE-Seq  
248 and CIRCLE-Seq the occurrence of unexpected mutations could be excluded completely (25,  
249 32, 33).

250 In the present study, healthy SRY-KO pigs showing normal development and growth rates  
251 were born (Fig. S6, Tab. S4). Moreover, the knockout of the HMG domain resulted in piglets  
252 with a female phenotype, including female external and internal genitalia. A previous study  
253 reported that rabbits with a knockout in the Sp1-binding sites of the SRY gene showed a  
254 dramatically reduced number of follicles in their ovaries (13). Although a normal copulatory  
255 behavior was observed, no pregnancy was established by mating of the genetically modified  
256 rabbits to wild type male rabbits. Transfer of blastocysts from wild type female rabbits into  
257 pseudo-pregnant SRY-KO rabbits resulted in a successful pregnancy with the birth of twelve  
258 pups. It was assumed that the abnormal development and reduced number of follicles were  
259 responsible for the decreased fertility in the sex-reversed rabbits. In our study, substantial  
260 size differences in all female genitalia of 9-months old SRY-KO pigs compared to the age-  
261 matched wild type controls demonstrated markedly retarded development of female  
262 genitalia. It has to be clarified, whether Y chromosome induced gene and hormone  
263 expression hampered the development of female genitalia in those SRY-KO pigs. One  
264 example of the influence on female sex development from disturbed hormone profiles  
265 (androstenedione and müllerian inhibition substance) in females is the bovine freemartin  
266 syndrome which leads to the masculinization of the female genitalia (34). Moreover, the  
267 absence of the second X chromosome in the SRY-KO pigs might have an impact on female  
268 sex development (35). The inactivation of one copy of the X chromosome is essential for  
269 undisturbed female development, nevertheless, several genes (mainly located on the short  
270 arm of the X chromosome) usually escape X chromosome inactivation (36). Further studies  
271 are necessary to investigate the gene expression and hormone levels in these SRY-KO pigs.  
272 An XO phenotype lacking the Y chromosome would be a promising animal model to  
273 investigate the influence of Y chromosomal gene expression and to clarify the importance of  
274 the second X chromosome in female sex development. It was previously shown, that  
275 CRISPR/Cas-mediated elimination of the murine Y chromosome is possible by targeting a  
276 cluster of genes along the Y chromosome (37). Moreover, in human embryonic stem cells it  
277 was shown that the CRISPR/Cas3 system has the potential to induce long-range  
278 chromosomal deletions (38). Both methods can be utilized to generate a porcine XO  
279 phenotype.

280

281 The results of this study further clarified the critical role of the porcine SRY gene in male sex  
282 determination. The pre-determination of sex using CRISPR/Cas9 targeting the porcine SRY  
283 gene could be of great benefit for animal welfare elimination the need for castration of male  
284 offspring to avoid boar taint by delivery of phenotypically female piglets. Currently, most  
285 piglets are surgically castrated without anesthesia shortly after birth, which raised animal  
286 welfare concerns and resulted in a ban of this practice within the EU. It was recently  
287 reported that knockout of the KISSR gene by TALEN-mediated mutagenesis resulted in the  
288 generation of boars that remained in the pre-pubertal stage lacking boar taint (39).  
289 However, to use these animals for breeding purposes, they have to be hormonally treated,  
290 which in turn might result in reduced consumer acceptance. Our results could pave the way  
291 for the production of boars that produce only female offspring by integrating a CRISPR/Cas9  
292 vector targeting the HMG domain of the SRY gene into the porcine genome. The transgenic  
293 founder would produce feminized males ( $XY^{SRY^-}$ ) and normal females. Alternatively, the  
294 CRISPR/Cas vector could target multiple genes on the Y chromosome during  
295 spermatogenesis to prevent development of Y-chromosomal sperm. Thereby, only female  
296 offspring would be generated. In both approaches, use of a self-excising vector should result  
297 in the generation of non-transgenic offspring. It remains to be determined whether products  
298 from genome-edited animals will find market acceptance in light of a critical public debate  
299 on genome engineering in many countries. Nevertheless, the above-mentioned strategies  
300 might improve welfare in pig farming and may lead to a more sustainable pork production.  
301 In addition to its importance for animal welfare, the SRY-KO pigs could be useful for better  
302 mechanistic insights into the human male-to-female sex reversal syndrome (Swyer  
303 syndrome) (40). Overall, 15 to 20 % of humans exhibiting male-to-female sex reversal  
304 syndrome carry mutations in or dysfunctions of the SRY gene. Most of the detected  
305 variations in humans are located within the “high mobility group” (HMG) domain of the SRY  
306 gene that is responsible for DNA binding (11, 41) and thought to act as the main functional  
307 domain for SRY protein synthesis (42-44). The murine SRY gene shows only 75% similarity to  
308 the human SRY gene. In contrast, the porcine and human SRY genes are closely related (~85  
309 % amino acid homology) and show similar expression profiles (5, 14). Taken this in account,  
310 the high similarity of the HMG domain and the high degree of physiological, genetic and  
311 anatomical similarity of the pig to humans renders the pig as a promising large animal model  
312 to gain insight into human sex determination and the interaction of sex chromosome related  
313 gene expression profiles (5, 45).

314

## 315 **6 Materials and Methods**

316 **Animal Welfare.** Animals were maintained and handled according to the German guidelines  
317 for animal welfare and the genetically modified organisms (GMO) act. The animal  
318 experiments were approved by an external animal welfare committee (Niedersaechsisches  
319 Landesamt fuer Verbraucherschutz und Lebensmittelsicherheit, LAVES, AZ: 33.9-42502-04-  
320 17/2541), which included ethical approval of the experiments.

321 **Transfection of gRNAs.** The CRISPR/Cas9 system was employed to induce defined deletions  
322 within the SRY gene (Ensembl transcript: ENSSSCG00000037443). Guide RNAs (gRNAs)  
323 targeting either the 5' flanking region of the HMG domain of the SRY gene (SRY\_1 and  
324 SRY\_2) or encompassing the HMG box (SRY\_1 and SRY\_3) were designed using the web-  
325 based design tool *CRISPOR* (<http://crispor.tefor.net/>) (Fig.2). Target sequences were further  
326 analyzed via BLAST to reduce the probability for off-target events. The gRNA oligos with a  
327 BbsI overhang were cloned into the linearized CRISPR/Cas9 vector pX330 (addgene, #42230).

328 Afterwards, two CRISPR/Cas9 plasmids were co-transfected (with a final concentration of 5  
329  $\mu\text{g}/\mu\text{l}$ ) into male porcine fibroblasts by electroporation (Neon<sup>TM</sup> Transfection System,  
330 ThermoFisher Scientific) to test the efficacy of the plasmids to induce double-strand breaks  
331 at the targeted locus. Electroporation conditions were as follows: 1350 V, 20 mm, and two  
332 pulses. After lysis of transfected cells, the cell lysate was analyzed using SRY specific primer  
333 (SRY-F: 5'-TGAAAGCGGACGATTACAGC and SRY-R: 5'-GGCTTTCTGTTCTGAGCAC-3'). The  
334 purified PCR product (10  $\text{ng}/\mu\text{l}$ ) (Invisorb<sup>®</sup> Fragment CleanUp – Startec) was Sanger  
335 sequenced to detect mutations at the target site.

336 **In-Vitro-Fertilization and In-Vitro-Maturation.** In-vitro-maturation of porcine oocytes was  
337 performed as previously described (46). Frozen boar semen from a fertile landrace boar was  
338 thawed for 30 sec. in a water bath (37 °C). The motility of sperm was analyzed using  
339 microscopy (Olympus, BH-2). After washing with Androhep<sup>®</sup> Plus (Minitube) and  
340 centrifugation for 6 minutes at 600 g, approx. 75 to 100 sperm per oocyte (depending on  
341 semen capacity) were used for fertilization (no sexed sperm were utilized for fertilization).  
342 After four hours of co-incubation, the fertilized oocytes were cultured in porcine-zygote-  
343 medium (PZM-3 medium).

344 **Somatic cell nuclear transfer.** SCNT was performed as previously described (47). Fetal  
345 fibroblasts transfected with gRNA SRY\_1 and SRY\_2 targeting the flanking region of the HMG  
346 domain of the SRY gene were used as donor cells. Eighty-two and eighty-six one- to two-cell  
347 embryos were surgically transferred into two hormonally synchronized German Landrace  
348 gilts (7 to 9-months old). Estrus was synchronized by application of 20 mg/day/gilt  
349 Altrenogest (Regumate<sup>®</sup> 4mg/ml, MSD Germany) for 12 days, followed by an injection of  
350 1,500 IU PMSG (pregnant mare serum gonadotropin, Pregmagon<sup>®</sup>, IDT Biologika) on day 13  
351 and introduction of ovulation by intramuscular injection of 500 IU hCG (human  
352 choriongonadotropin, Ovogest<sup>®</sup>300, MSD Germany) 78 h after PMSG administration.

353 **Preparation of RNP complexes for microinjection.** The Alt-R CRISPR/Cas9 system (IDT)  
354 consists of two CRISPR RNA components (crRNA and tracrRNA). The crRNA was individually  
355 designed to target the HMG domain of the SRY gene (SRY\_3: 5' – AAATACCGACCTCGTCGCAA  
356 – 3'). To generate an active gRNA, both components (crRNA and tracrRNA) were annealed (95  
357 °C for 5 min and then ramped down to 25 °C at 5 °C/min) in a ratio of 1 : 1 to reach a final  
358 concentration of 1  $\mu\text{g}/\mu\text{l}$ . Afterwards, the gRNA complex was mixed with Alt-R S.p. Cas9  
359 nuclease 3NLS and incubated for 10 minutes at room temperature to form an active RNP  
360 complex with a final concentration of 20  $\text{ng}/\mu\text{l}$ . The second RNP complex was prepared using  
361 the individually designed synthetic single-guide RNA (SRY\_1: 5' – ATGTCCGTCGGAATAGTG  
362 – 3') from Synthego. The sgRNA was mixed with purified 2NLS-Cas9 nuclease using a ratio of  
363 approximately 1 : 1.5 (0,84  $\mu\text{l}$  sgRNA [25pmols] and 1.25  $\mu\text{l}$  Cas9 protein [25 pmols]) and  
364 incubated for 10 minutes at room temperature. After centrifugation at 10,000 rpm for 10  
365 minutes and 4 °C, the supernatant was transferred into a new tube. Both RNP complexes  
366 were mixed in a ratio of 1 (SRY\_1) to 1.7 (SRY\_3) and directly used for microinjection.

367 **Microinjection.** The RNPs targeting the SRY gene were intracytoplasmically co-injected  
368 into IVF-produced zygotes obtained from slaughterhouse ovaries. Therefore, approx. 10 pl of  
369 the RNP solution was injected with a pressure of 600 hPa into IVF-produced zygotes  
370 (FemtoJet, Eppendorf). The injected zygotes were cultured in PZM-3 medium at 39 °C, 5 %  
371 CO<sub>2</sub> and 5 % O<sub>2</sub>. At day 5, when embryos reached the blastocyst stage, 31 or 32 embryos,  
372 respectively, were surgically transferred into two recipients.



373 **Establishing cell cultures from SRY-KO piglets.** Porcine fibroblasts were isolated from ear  
374 tissue of the piglets and cultured in Dulbecco's modified Eagle's medium (DMEM) with 2 %  
375 penicillin/streptomycin, 1 % non-essential amino acids and sodium pyruvate and 30 % fetal  
376 calf serum (FCS) (Gibco, 10270-106). When cells reached confluency, they were lysed with  
377 EDTA/Trypsin and genomic DNA was analyzed by PCR and karyotyping.

378 **PCR-based genotyping.** Genomic DNA of the pigs was extracted from tail tips. Cells were  
379 isolated from ear tissue. The DNA concentration was determined using the NanoDrop™  
380 (Kikser-Biotech) system. For genotyping of the pigs, polymerase chain reaction (PCR) was  
381 employed using specific primer (SRY-F: 5'-TGAAAGCGGACGATTACAGC-3' and SRY-R: 5'-  
382 GGCTTTCTGTTCTGAGCAC-3') flanking a 498 bp segment of the SRY gene (Fig. 2). PCR  
383 amplification was performed in a total volume of 50 µl : 20 ng DNA, 0.6 µM reverse and  
384 forward primer, 1.5 mM MgCl<sub>2</sub>, 0.2 mM dNTPs and 1.25 U *Taq* Polymerase. Cycling  
385 conditions were as follows: 32 cycles with denaturation at 94°C for 30 sec, annealing at 59 or  
386 60 °C for 45 sec, extension at 72°C for 30 sec and a final extension at 72°C for 5 minutes. The  
387 standard conditions for gel electrophoresis were set up to 80 V, 400 mA and 60 min using a 1  
388 % agarose gel. The PCR-product was purified (Invisorb®Fragment CleanUp-Kit, Startec) and  
389 Sanger sequenced. To further analyze the genotype of the piglets Y chromosome specific  
390 genes such as KDM6A, DDX3Y, CUL4BY, UTY, UBA1Y and TXLINGY were amplified  
391 (Supplements Table 1).

392 **Karyotyping of the cells.** Karyotyping was accomplished on porcine fibroblasts isolated from  
393 ear tissue. After treatment of cells for 30 minutes with colcemide (Invitrogen), cells were  
394 trypsinized and metaphases were prepared according to standard procedures. Fluorescence  
395 R-banding using chromomycin A3 and methyl green was performed as previously described  
396 in detail (48). At least 15 metaphases were analyzed per offspring. Standard karyotype of the  
397 pig includes 38 chromosomes. Karyotypes were described according to Gustavsson, 1988  
398 (49) and the International System for Human Cytogenetic Nomenclature (ISCN).

399 **Histology.** Porcine ovarian tissues were fixed with 4 % paraformaldehyde for 6 to 8 hours  
400 (smaller tissues of up to 5 x 10 mm) or overnight (tissues of up to 2 x 3 cm), incubated in 30  
401 % sucrose for two hours and frozen at - 80 °C. Afterwards, the tissues were embed in  
402 TissueTek® (Sakura, TTEK), cut in thin sections (15 µm) and stained with hematoxylin and  
403 eosin (HE) following standard procedures (50). Analyzes of inner structure of ovaries were  
404 done by microscopy (DMIL LED, Leica).

405 **Off-target analysis.** The top ten off-target effects were selected from the gRNA design tool  
406 *CRISPOR* (<http://crispor.tefor.net/>). PCR primers used for amplifying the PCR product are  
407 listed in Supplements Table 3 for SRY\_1 and Supplements Table 4 for SRY\_3. The PCR  
408 product was purified (Invisorb®Fragment CleanUp-Kit, Startec, Germany) and analyzed via  
409 Sanger sequencing.

410 **DigitalPCR.** Three assays including a probe and two primers (in a ratio of 2.5 probe to 9 nM  
411 primer) targeting the SRY and KDM6A genes (FAM™-labeled) on the Y chromosome and  
412 GGTA gene (HEX™-labeled) on chromosome 1 (as control) were designed (IDT) for digital  
413 polymerase chain reaction (dPCR). The dPCR was performed in a total reaction volume of  
414 14.5µl with the following components: 7.3 µl Master Mix (QuantStudio™3D Digital PCR  
415 Master Mix v2, ThermoFisher Scientific), 0.7 µl HEX™ and VIC™ dye-labeled assays each, 1.4  
416 µl diluted genomic DNA and 4.4 µl nuclease-free water. Standard dPCR thermal cycling  
417 conditions were used with an annealing temperature of 60 °C in the QuantStudio™ 3D

418 Digital device (ThermoFisher Scientific). Copy numbers of the genes within each chip were  
419 compared and analyzed via the QuantStudio™ 3D AnalysisSuite software  
420 (<http://apps.lifetechnologies.com/quantstudio3d/>). The copy number of the GGTA1 gene  
421 was set at 2 (biallelic), copy numbers of KDM6A and SRY genes were given in proportion to  
422 the GGTA1 gene. All findings were verified in three replicates with variable DNA  
423 concentration and different samples (51).

424 **Nanopore Sequencing.** Whole genome sequencing was performed by using the MinION  
425 device of Oxford Nanopore Technologies to investigate the porcine SRY locus. DNA from a  
426 male wild type blood sample (2 ml) was purified with the NucleoBand®HMW DNA Kit  
427 (Macherey-Nagel). To eliminate fragments below 40 kb the Short Read Elimination Kit XL  
428 (Circulomics) was utilized. Subsequently, 47 µl high molecular weight DNA (30 - 40 ng/µl)  
429 was prepared with the Ligation Sequencing Kit (SQK-LSK109, Oxford Nanopore) and the  
430 NEBNext® Companion Module for Oxford Nanopore Technologies® Ligation Sequencing  
431 (BioLabs, E7180S) using the Nanopore Oxford standard protocol for ligation sequencing.

## 432 **7 Acknowledgements**

433

434 This research did not receive any specific grant from funding agencies in the public,  
435 commercial, or not-for-profit sectors. Gudrun Göhring received a research grant from  
436 RIBIRTH. All other authors disclose any financial and personal relationships with other  
437 people or organizations that could inappropriately influence this work.

438 The authors are grateful to the IVF and SCNT team, Petra Hassel, Maren Ziegler, Roswitha  
439 Becker and Antje Frenzel for their effort in producing the SRY-KO pigs. We thank the staff  
440 from the pig facility for taking care of the pigs. We also thank Dr. Lutz Wiehlman for the  
441 cooperation and support to perform Nanopore Sequencing in the Research Core Unit  
442 Genomics in the MHH and Collin Davenport for the assembly of the data.

443 The pX330-U6-Chimeric\_BB-CBh-hSpCas9 was a gift from Feng Zhang (Addgene plasmid #  
444 42230 ; <http://n2t.net/addgene:42230> ; RRID:Addgene\_42230).

445

## 446 **8 References**

- 447 1. P. D. Waters, M. C. Wallis, J. A. M. Graves: Mammalian sex—origin and evolution of the Y  
448 chromosome and SRY. *Seminars in cell & developmental biology* 18, 389-400 (2017).
- 449 2. P. Parma, O. Radi: Molecular mechanisms of sexual development. *Sexual development* 6, 7-  
450 17 (2012).
- 451 3. J. Gubbay, J. Collignon, P. Koopman, B. Capel, A. Economou, *et al.*: A gene mapping to the  
452 sex-determining region of the mouse Y chromosome is a member of a novel family of  
453 embryonically expressed genes. *Nature* 346, 245-250 (1990).
- 454 4. P. Parma, E. Pailhoux, C. Cotinot: Reverse transcription-polymerase chain reaction analysis of  
455 genes involved in gonadal differentiation in pigs. *Biology of reproduction* 61, 741-748 (1999).
- 456 5. I. Daneau, J. F. Ethier, J. G. Lussier, D. W. Silversides: Porcine SRY gene locus and genital ridge  
457 expression. *Biology of reproduction* 55, 47-53 (1996).
- 458 6. D. W. Silversides, N. Pilon, R. Behdjani, A. Boyer, I. Daneau, *et al.*: Genetic manipulation of  
459 sex differentiation and phenotype in domestic animals. *Theriogenology* 55, 51-63 (2001).
- 460 7. J. Brennan, B. Capel: One tissue, two fates: molecular genetic events that underlie testis  
461 versus ovary development. *Nature reviews genetics* 5, 509-521 (2004).
- 462 8. M. Stachowiak, I. Szczerbal, J. Nowacka-Woszuik, H. Jackowiak, P. Sledzinski, *et al.*:  
463 Polymorphisms in the SOX9 region and testicular disorder of sex development (38, XX; SRY-  
464 negative) in pigs. *Livestock Science* 203, 48-53 (2017).

- 465 9. C. E. Bishop, D. J. Whitworth, Y. Qin, A. I. Agoulnik, I. U. Agoulnik, *et al.*: A transgenic insertion  
466 upstream of *sox9* is associated with dominant XX sex reversal in the mouse. *Nature genetics*  
467 26, 490-494 (2000).
- 468 10. B. Huang, S. Wang, Y. Ning, A. N. Lamb, J. Bartley: Autosomal XX sex reversal caused by  
469 duplication of *SOX9*. *American journal of medical genetics* 87, 349-353 (1999).
- 470 11. D. E. Bergstrom, M. Young, K. H. Albrecht, E. M. Eicher: Related function of mouse *SOX3*,  
471 *SOX9*, and *SRY* HMG domains assayed by male sex determination. *Genesis* 28, 111-124  
472 (2000).
- 473 12. T. Kato, K. Miyata, M. Sonobe, S. Yamashita, M. Tamano, *et al.*: Production of *Sry* knockout  
474 mouse using TALEN via oocyte injection. *Scientific reports* 3, 3136, doi: 3110.1038/srep0313  
475 (2013).
- 476 13. Y. Song, T. Liu, Y. Wang, J. Deng, M. Chen, *et al.*: Mutation of the Sp1 binding site in the 5' flanking  
477 region of *SRY* causes sex reversal in rabbits. *Oncotarget* 8, 38176-38183 (2017).
- 478 14. L. S. Whitfield, R. Lovell-Badge, P. N. Goodfellow: Rapid sequence evolution of the  
479 mammalian sex-determining gene *SRY*. *Nature* 364, 713-715 (1993).
- 480 15. B. M. Skinner, C. A. Sargent, C. Churcher, T. Hunt, J. Herrero, *et al.*: The pig X and Y  
481 Chromosomes: structure, sequence, and evolution. *Genome research* 26, 130-139 (2016).
- 482 16. A. Geraldes, T. Rambo, R. A. Wing, N. Ferrand, M. W. Nachman: Extensive gene conversion  
483 drives the concerted evolution of paralogous copies of the *SRY* gene in European rabbits.  
484 *Molecular biology and evolution* 27, 2437-2440 (2010).
- 485 17. D. Plesivkova, R. Richards, S. Harbison: A review of the potential of the MinION™  
486 single-molecule sequencing system for forensic applications. *Wiley Interdisciplinary Reviews:*  
487 *Forensic Science* 1, e1323, doi: 1310.1002/wfs1322.1323 (2019).
- 488 18. D. Branton, D. W. Deamer, A. Marziali, H. Bayley, S. A. Benner, *et al.*: The potential and  
489 challenges of nanopore sequencing. *Nanoscience and technology: A collection of reviews*  
490 *from Nature Journals*, 261-268 (2010).
- 491 19. T. Laver, J. Harrison, P. O'neill, K. Moore, A. Farbos, *et al.*: Assessing the performance of the  
492 oxford nanopore technologies minion. *Biomolecular detection and quantification* 3, 1-8  
493 (2015).
- 494 20. L. L. Washburn, K. H. Albrecht, E. M. Eicher: C57BL/6J-T-associated sex reversal in mice is  
495 caused by reduced expression of a *Mus domesticus* *Sry* allele. *Genetics* 158, 1675-1681  
496 (2001).
- 497 21. N. Wu, A.-B. Yu, H.-B. Zhu, X.-K. Lin: Effective silencing of *Sry* gene with RNA interference in  
498 developing mouse embryos resulted in feminization of XY gonad. *Journal of biomedicine and*  
499 *biotechnology*, 2012, doi:10.1155/2012/343891 (2012).
- 500 22. C. M. Nagamine, K.-i. Morohashi, C. Carlisle, D. K. Chang: Sex reversal caused by *Mus*  
501 *musculus domesticus* Y chromosomes linked to variant expression of the testis-determining  
502 gene *Sry*. *Developmental biology* 216, 182-194 (1999).
- 503 23. B. Petersen: Basics of genome editing technology and its application in livestock species.  
504 *Reproduction in Domestic Animals* 52, 4-13 (2017).
- 505 24. B. Petersen, H. Niemann: Molecular scissors and their application in genetically modified  
506 farm animals. *Transgenic research* 24, 381-396 (2015).
- 507 25. I. Tasan, H. Zhao: Targeting Specificity of the CRISPR/Cas9 System. *ACS synthetic biology* 6,  
508 1609-1613 (2017).
- 509 26. B. Shen, W. Zhang, J. Zhang, J. Zhou, J. Wang, *et al.*: Efficient genome modification by CRISPR-  
510 Cas9 nickase with minimal off-target effects. *Nature methods* 11, 399-402 (2014).
- 511 27. J. Shin, F. Jiang, J.-J. Liu, N. L. Bray, B. J. Rauch, *et al.*: Disabling Cas9 by an anti-CRISPR DNA  
512 mimic. *Science advances* 3, e1701620, doi:1701610.1701126/sciadv.1701620 (2017).
- 513 28. S. Svitashv, C. Schwartz, B. Lenderts, J. K. Young, A. M. Cigan: Genome editing in maize  
514 directed by CRISPR-Cas9 ribonucleoprotein complexes. *Nature communications* 7, e13274,  
515 doi: 13210.11038/ncomms13132 (2016).

- 516 29. B. Farboud, E. Jarvis, T. L. Roth, J. Shin, J. E. Corn, *et al.*: Enhanced genome editing with Cas9  
517 ribonucleoprotein in diverse cells and organisms. *Journal of visualized experiments* 135,  
518 e57350, doi:57310.53791/57350 (2018).
- 519 30. Y. Chen, X. Liu, Y. Zhang, H. Wang, H. Ying, *et al.*: A self-restricted CRISPR system to reduce  
520 off-target effects. *Molecular therapy* 24, 1508-1510 (2016).
- 521 31. S. Kim, D. Kim, S. W. Cho, J. Kim, J.-S. Kim: Highly efficient RNA-guided genome editing in  
522 human cells via delivery of purified Cas9 ribonucleoproteins. *Genome research* 24, 1012-1019  
523 (2014).
- 524 32. S. Q. Tsai, Z. Zheng, N. T. Nguyen, M. Liebers, V. V. Topkar, *et al.*: GUIDE-seq enables genome-  
525 wide profiling of off-target cleavage by CRISPR-Cas nucleases. *Nature biotechnology* 33, 187-  
526 197 (2015).
- 527 33. S. Q. Tsai, N. T. Nguyen, J. Malagon-Lopez, V. V. Topkar, M. J. Aryee, *et al.*: CIRCLE-seq: a  
528 highly sensitive in vitro screen for genome-wide CRISPR-Cas9 nuclease off-targets. *Nature*  
529 *methods* 14, 607-614 (2017).
- 530 34. A. Padula: The freemartin syndrome: an update. *Animal reproduction science* 87, 93-109  
531 (2005).
- 532 35. I. Okamoto, A. P. Otte, C. D. Allis, D. Reinberg, E. Heard: Epigenetic dynamics of imprinted X  
533 inactivation during early mouse development. *Science* 303, 644-649 (2004).
- 534 36. L. Carrel, A. A. Cottle, K. C. Goglin, H. F. Willard: A first-generation X-inactivation profile of the  
535 human X chromosome. *Proceedings of the national academy of sciences* 96, 14440-14444  
536 (1999).
- 537 37. E. Zuo, X. Huo, X. Yao, X. Hu, Y. Sun, *et al.*: CRISPR/Cas9-mediated targeted chromosome  
538 elimination. *Genome biology* 18, 224, doi: 210.1186/s13059-13017-11354-13054 (2017).
- 539 38. A. E. Dolan, Z. Hou, Y. Xiao, M. J. Gramelspacher, J. Heo, *et al.*: Introducing a spectrum of  
540 long-range genomic deletions in human embryonic stem cells using type I CRISPR-Cas.  
541 *Molecular cell* 74, 1-15 (2019).
- 542 39. T. S. Sonstegard, D. Carlson, C. Lancto, S. C. Fahrenkrug: Precision animal breeding as a  
543 sustainable, non-GMO solution for improving animal production and welfare. *Biennial Conf*  
544 *Aust Soc Anim Prod* 31, 316-317 (2016).
- 545 40. E. Battiloro, B. Angeletti, M. C. Tozzi, L. Bruni, S. Tondini, *et al.*: A novel double nucleotide  
546 substitution in the HMG box of the SRY gene associated with Swyer syndrome. *Human*  
547 *genetics* 100, 585-587 (1997).
- 548 41. R. Sekido: SRY: A transcriptional activator of mammalian testis determination. *The*  
549 *international journal of biochemistry & cell biology* 42, 417-420 (2010).
- 550 42. V. R. Harley, M. J. Clarkson, A. Argentaro: The molecular action and regulation of the testis-  
551 determining factors, SRY (sex-determining region on the Y chromosome) and SOX9 [SRY-  
552 related high-mobility group (HMG) box 9]. *Endocrine reviews* 24, 466-487 (2003).
- 553 43. P. Berta, J. B. Hawkins, A. H. Sinclair, A. Taylor, B. L. Griffiths, *et al.*: Genetic evidence  
554 equating SRY and the testis-determining factor. *Nature* 348, 448-450 (1990).
- 555 44. J. R. Hawkins: Mutational analysis of SRY in XY females. *Human mutation* 2, 347-350 (1993).
- 556 45. V. R. Harley, P. N. Goodfellow: The biochemical role of SRY in sex determination. *Molecular*  
557 *reproduction and development* 39, 184-193 (1994).
- 558 46. A. Lucas-Hahn, B. Petersen, M. Nowak-Imialek, U. Baulain, R. Becker, *et al.*: 122 A New  
559 Maturation Medium Improves Porcine Embryo Production *In Vitro*. *Reproduction, Fertility*  
560 *and Development* 30, 200-201 (2018).
- 561 47. M. Hölker, B. Petersen, P. Hassel, W. A. Kues, E. Lemme, *et al.*: Duration of in vitro  
562 maturation of recipient oocytes affects blastocyst development of cloned porcine embryos.  
563 *Cloning and stem cells* 7, 35-44 (2005).
- 564 48. B. Schlegelberger, S. Metzke, S. Harder, R. Zühlke-Jenisch, Y. Zang, *et al.*: Diagnostic  
565 Cytogenetics. *Classical and molecular cytogenetics of tumor cells* 35, 151-185 (1999).
- 566 49. I. Gustavsson: Standard karyotype of the domestic pig: Committee for the Standardized  
567 Karyotype of the Domestic Pig. *Hereditas* 109, 151-157 (1988).

- 568 50. R. D. Cardiff, C. H. Miller, R. J. Munn: Manual hematoxylin and eosin staining of mouse tissue  
569 sections. *Cold Spring Harbor protocols* 2014, 655-658 (2014).  
570 51. J. F. Huggett, C. A. Foy, V. Benes, K. Emslie, J. A. Garson, *et al.*: The Digital MIQE Guidelines:  
571 M inimum I nformation for Publication of Q uantitative Digital PCR E xperiments. *Clinical*  
572 *chemistry* 59, 892-902 (2013).

573

574

575

## 576 **9 Figures and Tables**

577 **Figure 1** Schematic illustration of the experimental design to generate SRY-KO pigs (XY<sup>SRY<sup>-</sup></sup>) by either  
578 intracytoplasmic microinjection of two CRISPR/Cas9 RNP complexes into IVF-produced zygotes or  
579 somatic cell nuclear transfer (SCNT). Embryos were surgically transferred into hormonally  
580 synchronized recipients, and the offspring were analyzed pheno- and genotypically.

581

582

583 **Figure 2 a** Location of two sgRNA target sites (yellow underlined) flanking the HMG-box (red box) of  
584 the SRY gene. **b** Schematic illustration showing the guide RNAs (yellow underlined) targeting an  
585 approx. 72 bp segment in the 5' flanking region of the HMG domain (red box) of the SRY gene. Primer  
586 amplifying the SRY exon are indicated with green arrows.

587

588 **Figure 3** Twelve healthy piglets were born after cytoplasmic microinjection of two CRISPR/Cas9 RNP  
589 complexes into IVF-produced zygotes and surgical embryo transfer. Three of the piglets showed  
590 complete female external genitalia. The deletion of the SRY gene had no effect on growth rate  
591 compared to wild type. All piglets developed normally.

592

593

594 **Figure 4** PCR-based detection of the mutated SRY gene in piglets (714/1 and 715/1-11) generated via  
595 microinjection of CRISPR/Cas9 RNP complexes. Three piglets (715/2, 715/7 and 714/1, indicated with  
596 white asterisk) showed deletions of approx. 300 bp within the SRY gene compared to a male wild  
597 type control (WT 578 F7). The male WT control showed an expected band of ~500 bp. The female WT  
598 control (WT 578 F4) is negative, as expected for the SRY gene.

599

600 **Figure 5** Sanger sequencing of the purified PCR product of the SRY-KO piglets (715/2, 715/7 and  
601 714/1) showed genetic modifications within the SRY locus. Piglet 715/7 displayed a deletion of 292bp  
602 and piglet 715/2 of 266bp. Piglet 714/1 showed two different mutations with a deletion of 298bp  
603 and an indel formation of -298bp and +1bp.

604

605 **Figure 6** Karyotyping of cells from the SRY-KO piglet 715/2 confirmed the male genotype of this  
606 piglet. The karyotypes of piglet 715/7 and 714/1 are shown in the Supplements Fig. 6.

607

608 **Figure 7** The uteri and ovaries of the 9-months old SRY-KO, XY pig (714/1) and the age-matched  
609 WT,XX piglet (control from same litter). **a** Substantial size differences were displayed in the 9-months

610 old SRY-KO pig compared to the female wild type control. **b** The ovaries in the 9-month old SRY-KO,  
611 XY pig were significant smaller than the ovaries of the WT, XX pig and showed no follicles.  
612

613 **Figure 8** Schematic diagram of the first trail of dPCR. The dPCR biplex assay revealed a two fold lower  
614 copy number of the monoallelic KDM6A gene compared to the biallelic GGTA1 gene, as expected. A  
615 similar copy number of the monoallelic SRY gene compared to the biallelic GGTA1 gene indicated a  
616 duplication of the SRY locus.  
617

618

619 **Figure 9** Schematic diagram of the second trail of dPCR. The dPCR biplex assay revealed a stepwise  
620 reduction of the copy number of the SRY gene from wild type control to complete SRY-KO pig  
621 compared to the GGTA1 gene. These results supported the assumption of a porcine SRY duplication.  
622

623

624 **Table 1** Results of the embryo transfer of microinjected zygotes into recipients. Three of twelve  
625 piglets showed a sex reversal with a female phenotype and a male genotype.

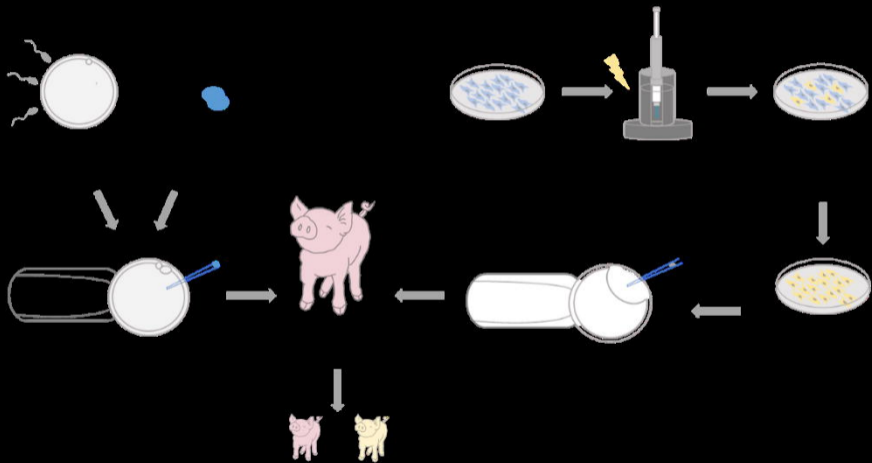

Exon SRY gene

HMG-box SRY gene

C T C C T C A C T A T T T C C G A C G G A C A A T C A ... T A A A T A C C G A C C T C G T C G C A A G G G  
C C T C A C T A T T T C C G A C G G A C A A T A A A T A C C G A C C T C G T C G C A A G G G

Exon SRY gene

HMG-box SRY gene

C T C C T C A C T A T T T C C G A C G G A C A A T C A ... G C C A G G A T C G T G T C A A G C G A C C C A  
C C T C A C T A T T T C C G A C G G A C A A T C C A G G A T C G T G T C A A G C G A C C C A



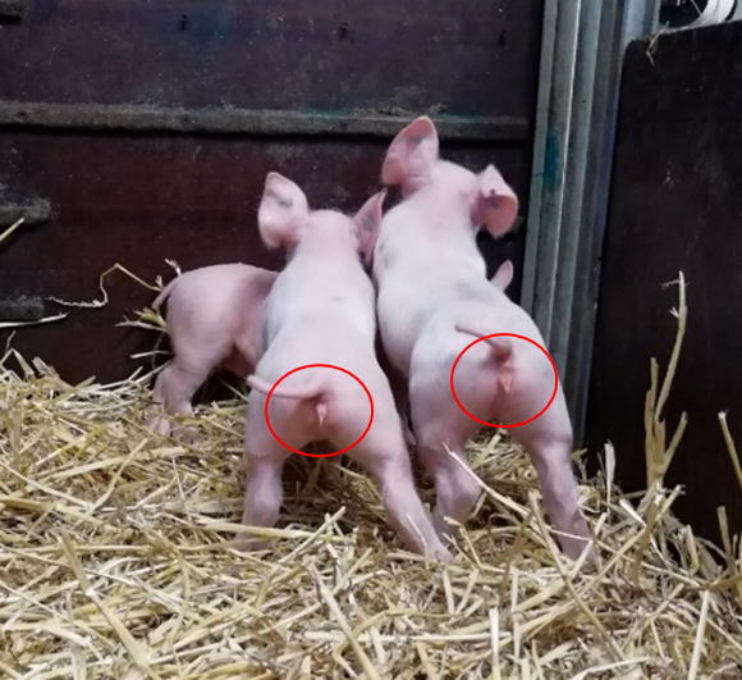

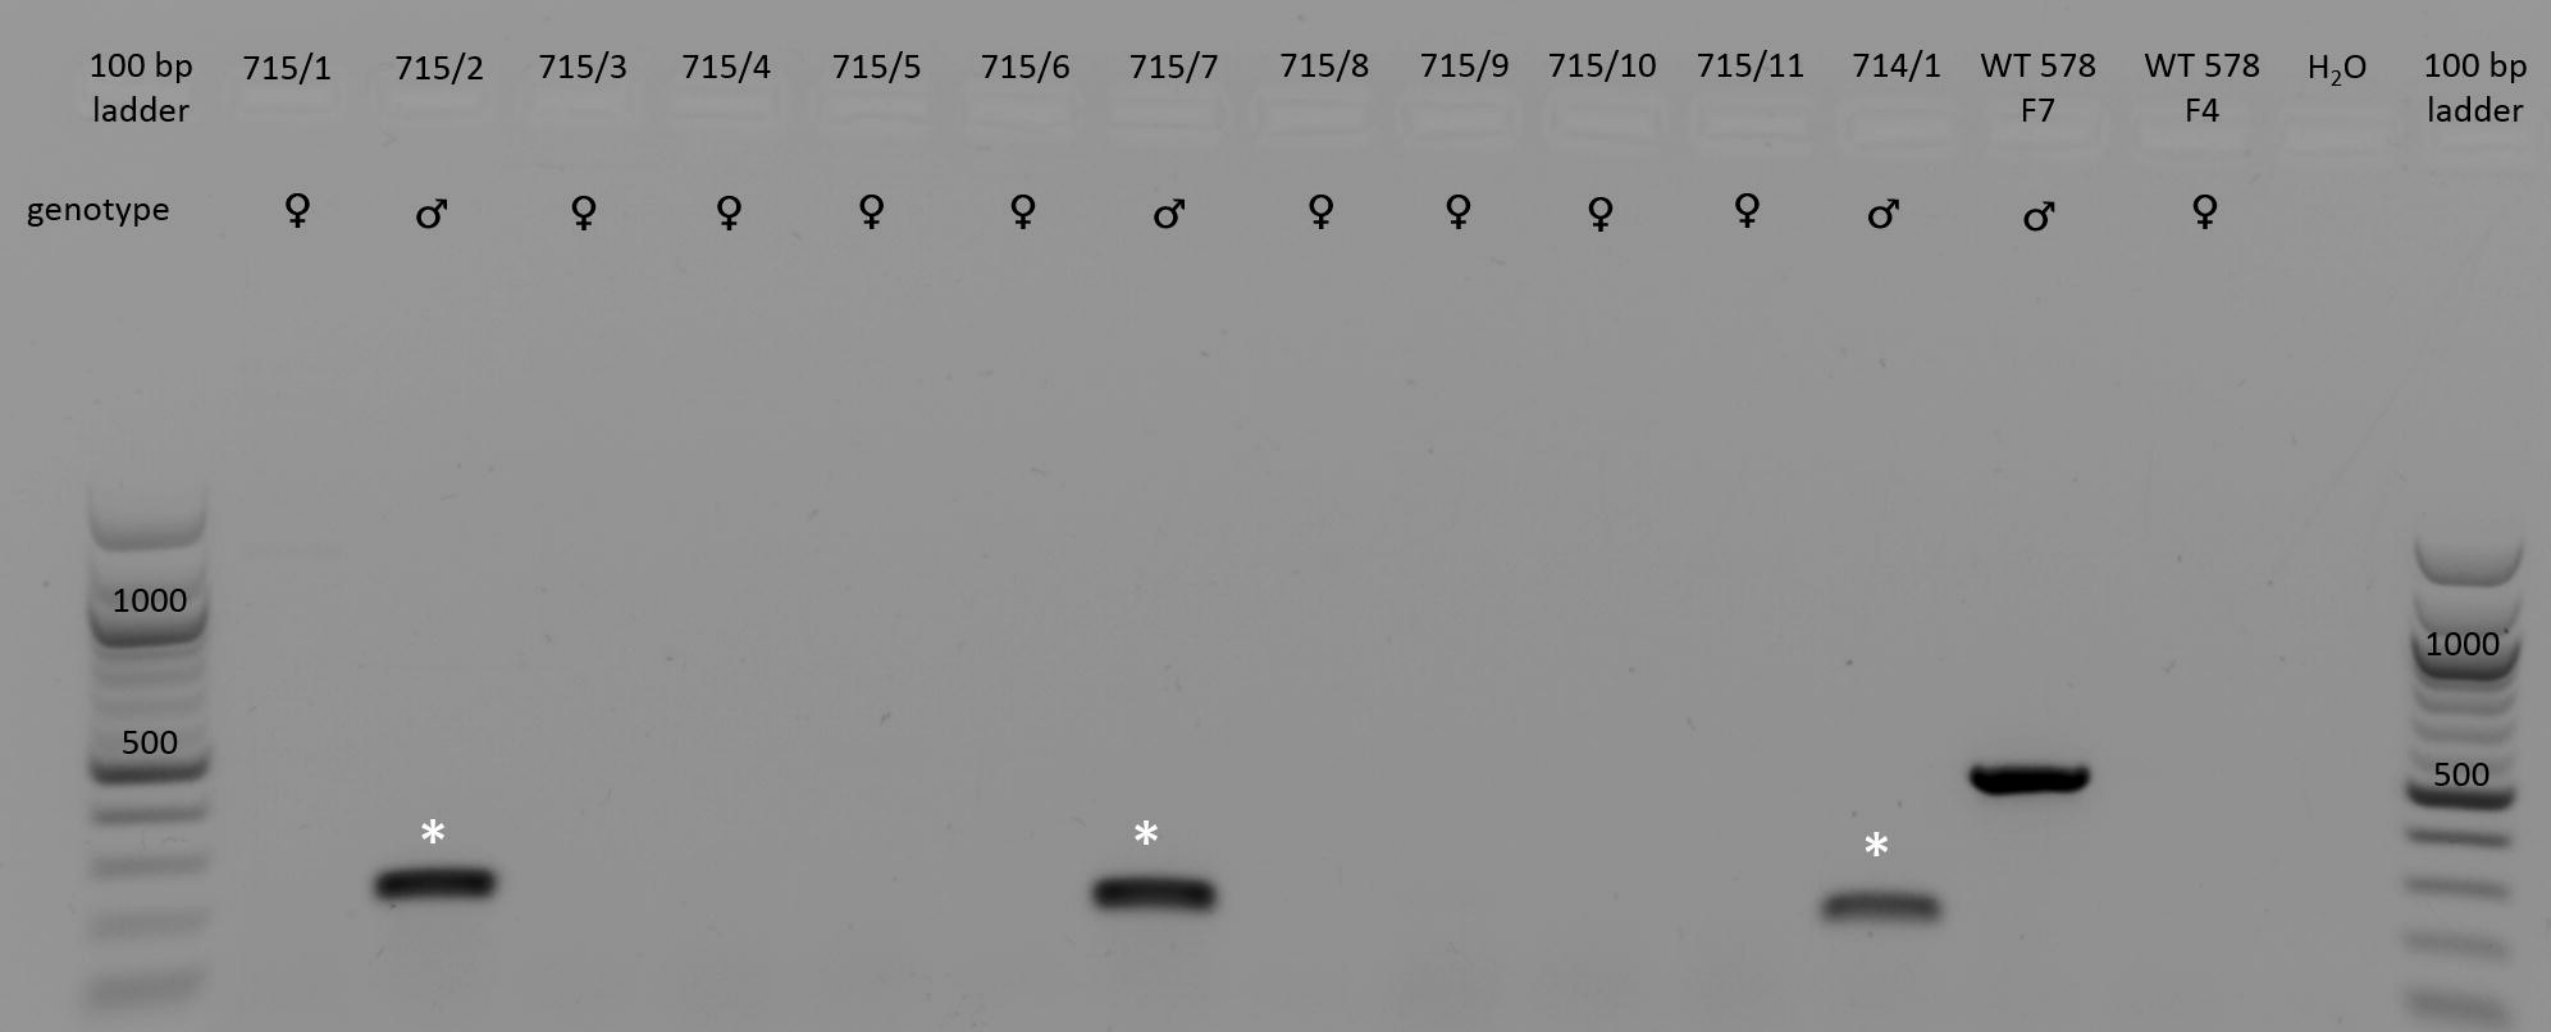



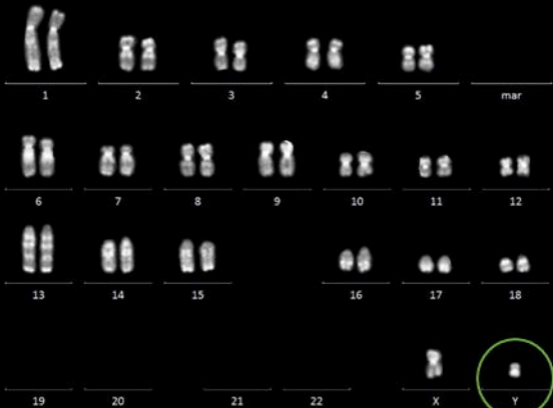

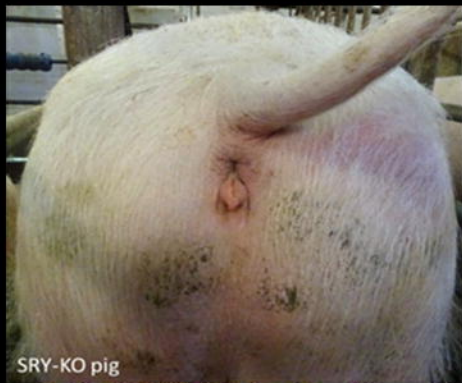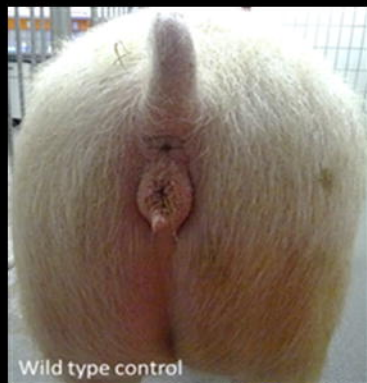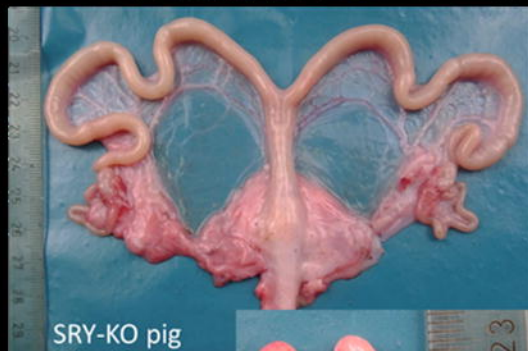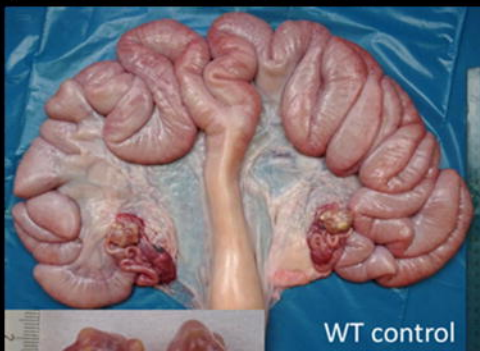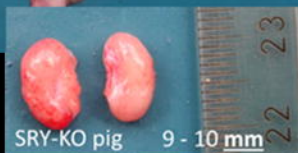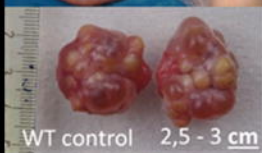

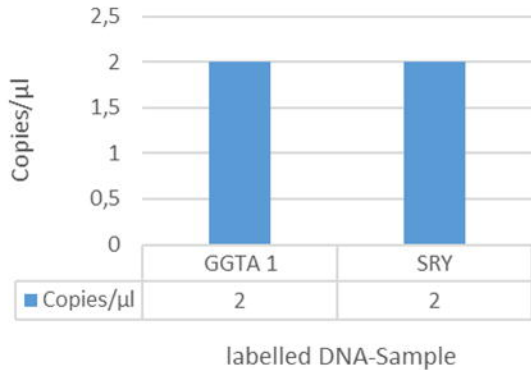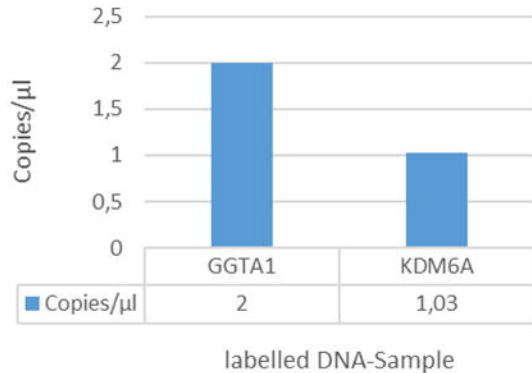

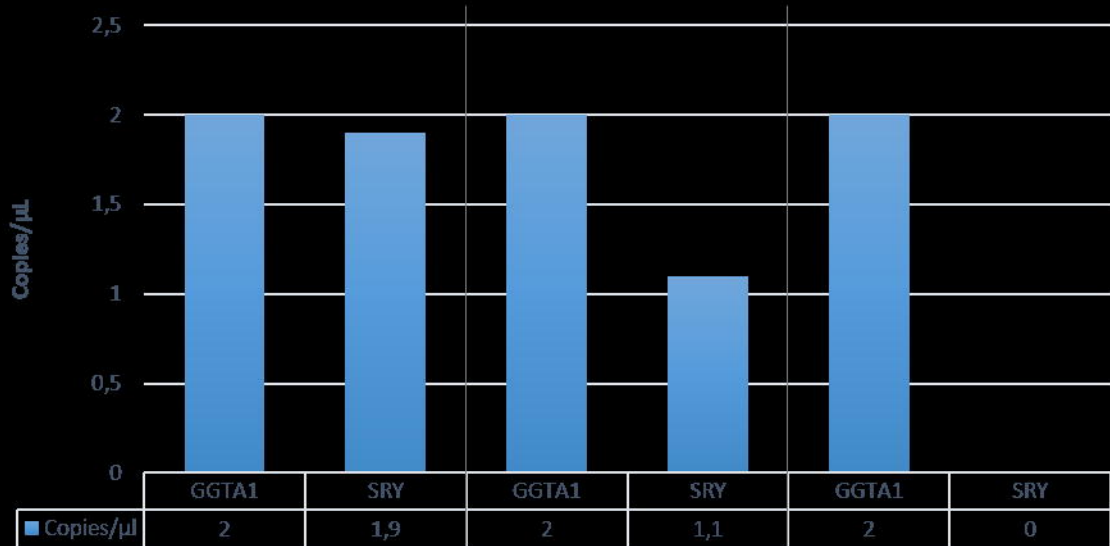

|             |    |   |    |   |   |
|-------------|----|---|----|---|---|
|             |    |   |    |   |   |
| <b>8018</b> | 32 | - | -  | - | - |
|             |    |   |    |   |   |
| <b>715</b>  | 31 | + | 11 | 2 | 2 |
